# Supplementary material for: Measurement of glucose exclusion from the fully hydrated DOPE inverse hexagonal phase
Source: Royal Society of Chemistry journal article supplement (doi:10.1039/b919086d), 2010-01-01
Supplement: b919086d.pdf [file b919086d.pdf]

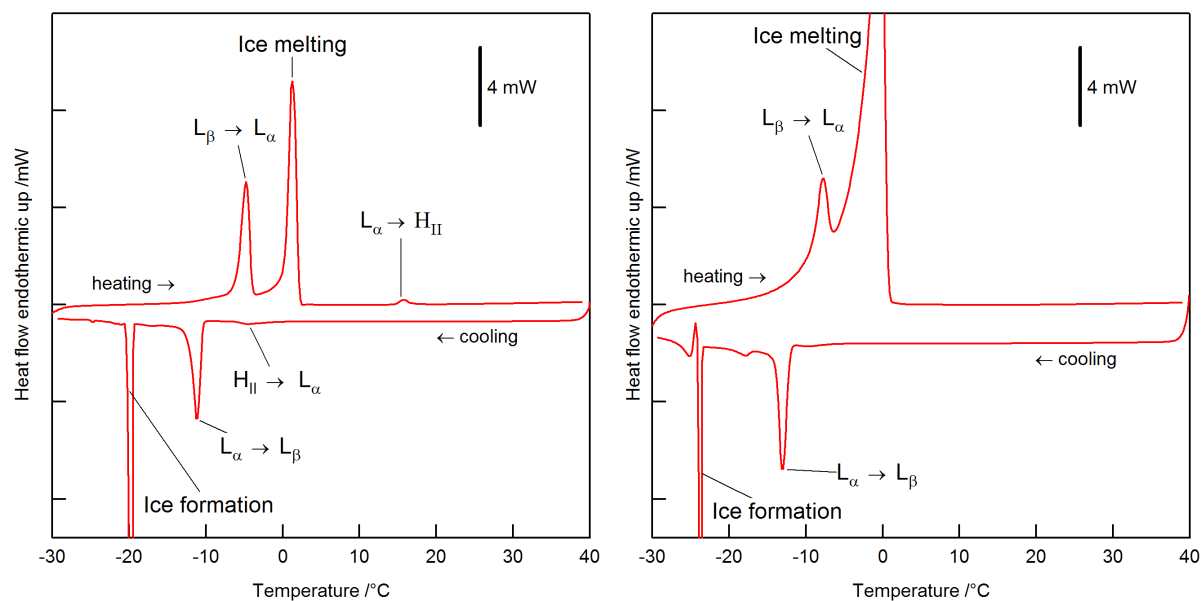

Figure 1. Differential scanning calorimetry (DSC) traces for DOPE fully hydrated in water and DOPE fully hydrated in a water/glucose solution with a lipid:glucose molar ratio 1:0.5. The lipid volume fraction of each sample is 0.5. DSC was performed on a Perkin-Elmer Pyris A DSC with intracooler. Temperature scan rate was 10 °/min.

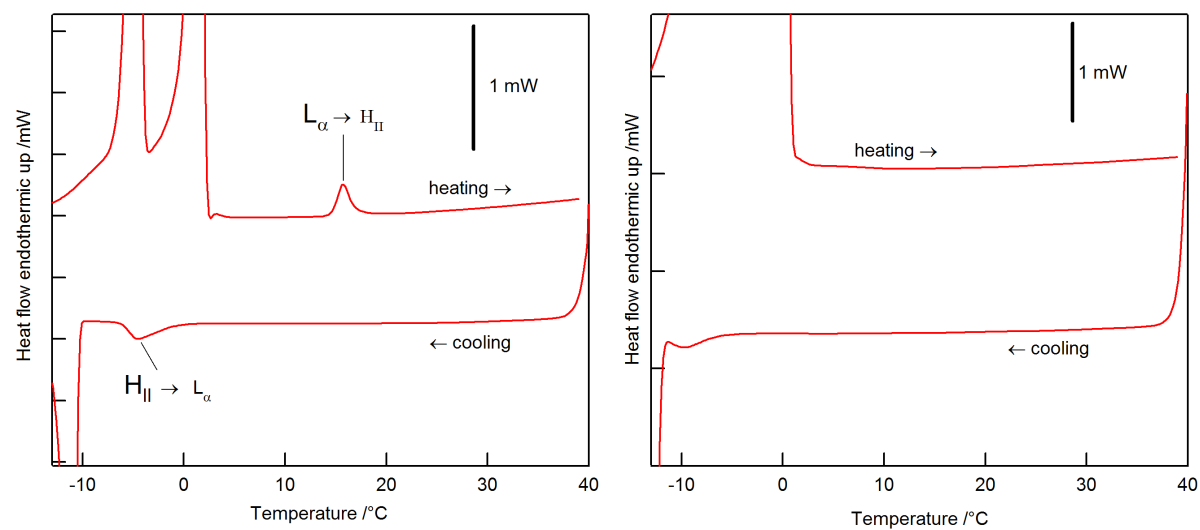

Figure 2. As above on an expanded vertical axis.
